# Supplementary material for: Synthesis of MnO2–CuO–Fe2O3/CNTs catalysts: low-temperature SCR activity and formation mechanism
Source: Beilstein J Nanotechnol. 2019 Apr 11;10:848–55. doi: 10.3762/bjnano.10.85 (PMC6466767; doi:10.3762/bjnano.10.85)
Supplement: File 1 — Additional experimental data. [file Beilstein_J_Nanotechnol-10-848-s001.pdf]

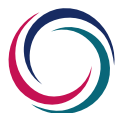

## Supporting Information

for

### **Synthesis of $\text{MnO}_2\text{--CuO--Fe}_2\text{O}_3/\text{CNTs}$ catalysts: low-temperature SCR activity and formation mechanism**

Yanbing Zhang, Lihua Liu, Yingzan Chen, Xianglong Cheng, Chengjian Song, Mingjie Ding and Haipeng Zhao

*Beilstein J. Nanotechnol.* **2019**, *10*, 848–855. doi:10.3762/bjnano.10.85

## Additional experimental data

**Table S1:** BET surface area and pore volume for the pristine CNTs, acid-treated CNTs and as-prepared catalysts

| sample                                         | $S_{\text{BET}}$ ( $\text{m}^2 \cdot \text{g}^{-1}$ ) | pore volume ( $\text{cm}^3 \cdot \text{g}^{-1}$ ) |
|------------------------------------------------|-------------------------------------------------------|---------------------------------------------------|
| pristine CNTs                                  | 63.11                                                 | 0.1457                                            |
| acid-treated CNTs                              | 71.11                                                 | 0.1585                                            |
| 1% Mn–CuO–Fe <sub>2</sub> O <sub>3</sub> /CNTs | 61.29                                                 | 0.1319                                            |
| 2% Mn–CuO–Fe <sub>2</sub> O <sub>3</sub> /CNTs | 86.40                                                 | 0.1660                                            |
| 4% Mn–CuO–Fe <sub>2</sub> O <sub>3</sub> /CNTs | 95.66                                                 | 0.1841                                            |
| 6% Mn–CuO–Fe <sub>2</sub> O <sub>3</sub> /CNTs | 130.54                                                | 0.2447                                            |
| Mn–Cu–FeO <sub>x</sub> /CNTs-IWIM              | 111.05                                                | 0.1673                                            |

**Table S2:** Relative oxygen content of the as-prepared catalysts.

| sample                                                        | O(%)           |                |
|---------------------------------------------------------------|----------------|----------------|
|                                                               | O <sub>L</sub> | O <sub>S</sub> |
| 4% MnO <sub>2</sub> –CuO–Fe <sub>2</sub> O <sub>3</sub> /CNTs | 33.3           | 66.7           |
| Mn–Cu–FeO <sub>x</sub> /CNTs-IWIM                             | 63.2           | 36.8           |

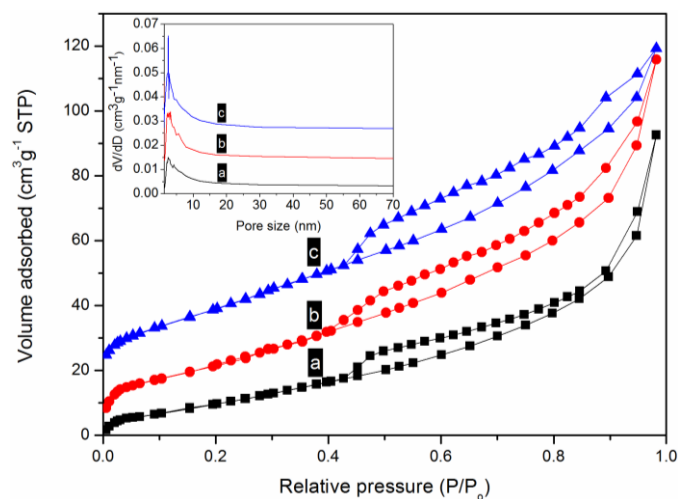

**Figure S1:** N<sub>2</sub> adsorption–desorption isotherm and pore size distribution (inset) of (a) acid-treated CNTs, (b) 4% MnO<sub>2</sub>–CuO–Fe<sub>2</sub>O<sub>3</sub>/CNTs, and (c) Mn–Cu–FeO<sub>x</sub>/CNTs-IWIM.

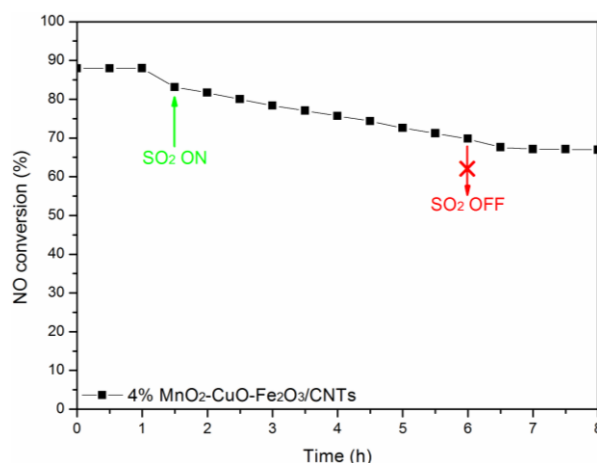

**Figure S2:** SO<sub>2</sub> tolerance of 4% MnO<sub>2</sub>–CuO–Fe<sub>2</sub>O<sub>3</sub>/CNTs catalyst. Reaction conditions: [NO] = [NH<sub>3</sub>] = 400 ppm, [SO<sub>2</sub>] = 50 ppm (when used), [O<sub>2</sub>] = 5%, N<sub>2</sub> as balance gas, WHSV=280 L·g<sub>cat</sub><sup>−1</sup>·h<sup>−1</sup>, 0.15 g catalyst.

### BET surface area data

The results of BET surface area measurements (Table S1) show that the surface area of the pristine CNTs was 63.11 m<sup>2</sup>·g<sup>−1</sup>, whereas it became larger after being loaded with catalyst, indicating the even distribution of metal-oxide catalysts on the CNTs. It should be noted that although the 4% MnO<sub>2</sub>–CuO–Fe<sub>2</sub>O<sub>3</sub>/CNTs catalyst showed the best catalytic activity among all samples, it possessed a smaller surface area (95.66 m<sup>2</sup>·g<sup>−1</sup>) than Mn–Cu–FeO<sub>x</sub>/CNTs-IWIM (111.05 m<sup>2</sup>·g<sup>−1</sup>), revealing that the surface area is not the only important factor in SCR activity [1].

## **N<sub>2</sub> adsorption-desorption curves**

Figure S1 shows the N<sub>2</sub> adsorption–desorption isotherm and the pore size distribution of the acid-treated CNTs and the as-synthesized catalysts. All samples present a typical type-IV isotherm along with a type-H4 loop, verifying the mesoporous structure [2,3]. The pore sizes of the samples were between 2.5 and 5.0 nm.

## **SO<sub>2</sub> tolerance**

SO<sub>2</sub>, a common component of flue gas, can inhibit the catalytic activity. Therefore, the catalysts need to be resistant against SO<sub>2</sub>. In Figure S2, it is shown that the denitration efficiency of 4% MnO<sub>2</sub>–CuO–Fe<sub>2</sub>O<sub>3</sub>/CNTs catalyst is ca. 87.9% in the absence of SO<sub>2</sub>. When 50 ppm SO<sub>2</sub> is added to the gas flow for 5 h, there is a decline in catalytic efficiency to ca. 67.6%. Afterwards, the catalytic activity remains stable at around 67.1%. Hence, the 4% MnO<sub>2</sub>–CuO–Fe<sub>2</sub>O<sub>3</sub>/CNTs exhibits SO<sub>2</sub> tolerance, which is favorable for its practical application.

## **References**

1. Zhang, Y.; Zheng, Y.; Wang, X.; Lu, X. *Catal. Commun.* **2015**, *62*, 57–61. doi:10.1016/j.catcom.2014.12.023
2. Schill, L.; Putluru, S.; Fehrmann, R.; Jensen, A. *Catal. Lett.* **2014**, *144*, 395–402. doi:10.1007/s10562-013-1176-2
3. Sing, K.; Everet, D.; Haul, R.; Moscou, L.; Pierotti, R.; Rouquerol, J.; Siemieniowska, T. *Pure Appl. Chem.* **1985**, *57*, 603–619. doi:10.1351/pac198557040603
